# Supplementary material for: Reassessing Revascularization Strategies in Coronary Artery Disease and Type 2 Diabetes Mellitus
Source: PubMed Central journal article supplement (PMC8568070; doi:10.3389/fcvm.2021.738620), 2021-10-21
Supplement: Table_1.pdf [file Table_1.pdf]

Supplementary Table 1. Baseline clinical characteristics

| Characteristics                       | ARTS           |            | FREEDOM         |                | FREEDOM Follow-On |                | MASS II        |               | VACARDS        |                |
|---------------------------------------|----------------|------------|-----------------|----------------|-------------------|----------------|----------------|---------------|----------------|----------------|
|                                       | CABG<br>(N=96) | PCI(N=112) | CABG<br>(N=277) | PCI<br>(N=325) | CABG<br>(N=947)   | PCI<br>(N=953) | CABG<br>(N=59) | PCI<br>(N=56) | CABG<br>(N=97) | PCI<br>(N=101) |
| Previous myocardial infarction        | 47(49%)        | 46(41%)    | 71(26%)         | 83(26%)        | 237(25%)          | 250(26%)       | 22(37%)        | 26(46%)       | 34(35%)        | 45(45%)        |
| Previous stroke                       |                |            | 5(2%)           | 18(6%)         | 28(3%)            | 37(4%)         |                |               | 8(8%)          | 7(7%)          |
| Hypertension                          | 54(56%)        | 72(64%)    | 245(88%)        | 282(87%)       | 806(85%)          | 805(84%)       | 43(73%)        | 41(73%)       | 90(93%)        | 97(96%)        |
| Hypercholesterolemia                  | 47(49%)        | 62(55%)    |                 |                |                   |                |                |               |                |                |
| Congestive heart failure              |                |            | 101(36%)        | 92(28%)        |                   |                |                |               | 44(45%)        | 37(37%)        |
| Acute coronary syndrome               |                |            | 99(36%)         | 112(34%)       | 279(29%)          | 304(32%)       |                |               |                |                |
| Current smoking                       | 16(17%)        | 23(21%)    | 49(18%)         | 59(18%)        | 157(17%)          | 141(15%)       |                |               | 20(21%)        | 28(28%)        |
| Left ventricular ejection fraction, % | 60.3           | 60.5       | 66.1±11.1       | 65.3±12.5      | 66.7±10.5         | 65.7±12.1      | 69±8           | 68±11         |                |                |

Values are N (%) or mean ± standard deviation.
